# Supplementary material for: Environmental effects on aerosol–cloud interaction in non-precipitating marine boundary layer (MBL) clouds over the eastern North Atlantic
Source: Copernicus journal article supplement (doi:10.5194/acp-22-335-2022), 2022-01-10
Supplement: Supplementary file 1 [file acp-22-335-2022-supplement.pdf]

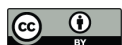

*Supplement of*

## **Environmental effects on aerosol–cloud interaction in non-precipitating marine boundary layer (MBL) clouds over the eastern North Atlantic**

**Xiaojian Zheng et al.**

*Correspondence to:* Baikex Xi ([baikex@arizona.edu](mailto:baikex@arizona.edu))

The copyright of individual parts of the supplement might differ from the article licence.

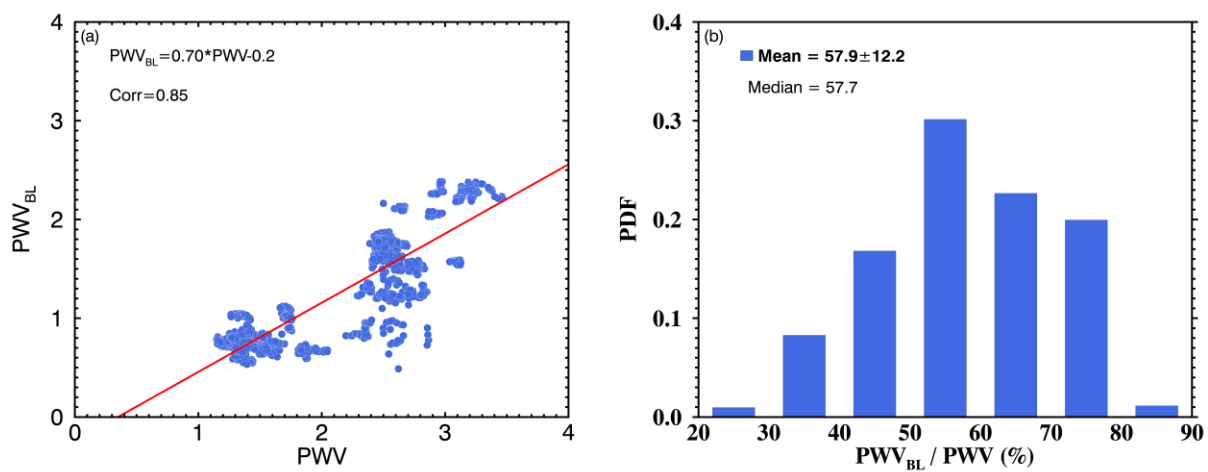

**Figure S1.** (a) Scatterplot of PWV versus PWV<sub>BL</sub>; and (b) distribution of the percentage ratio of PWV<sub>BL</sub>/PWV.

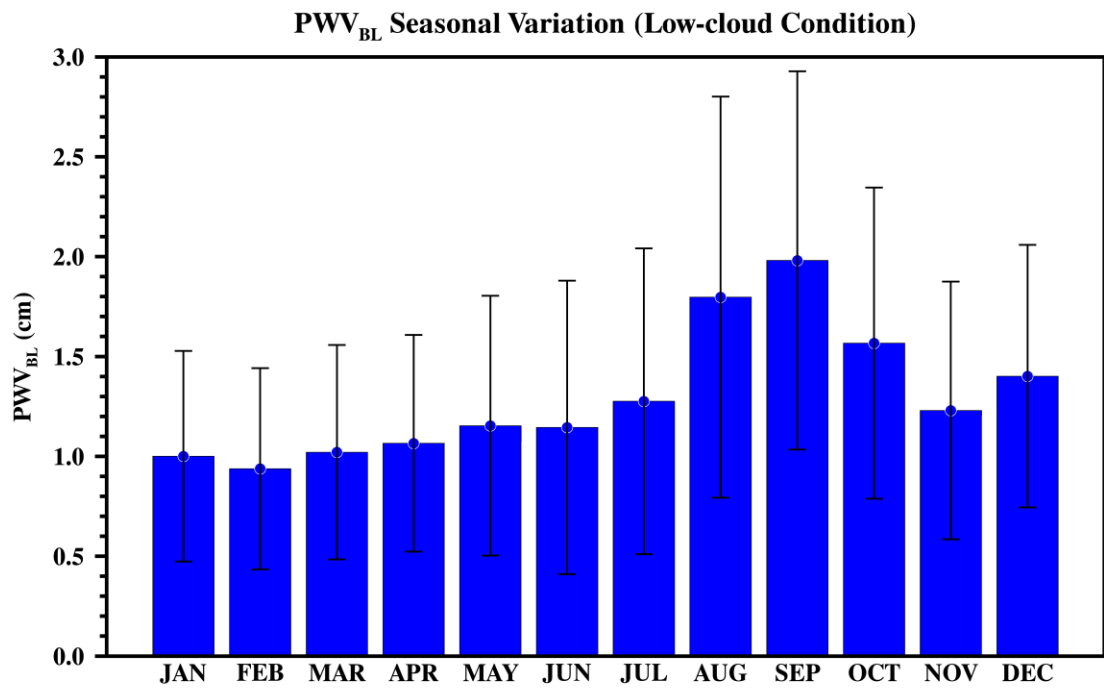

**Figure S2.** Seasonal variation of PWV<sub>BL</sub> under single-layer low cloud conditions, from 2016 to 2018. Whiskers denote one standard deviation for each bin.

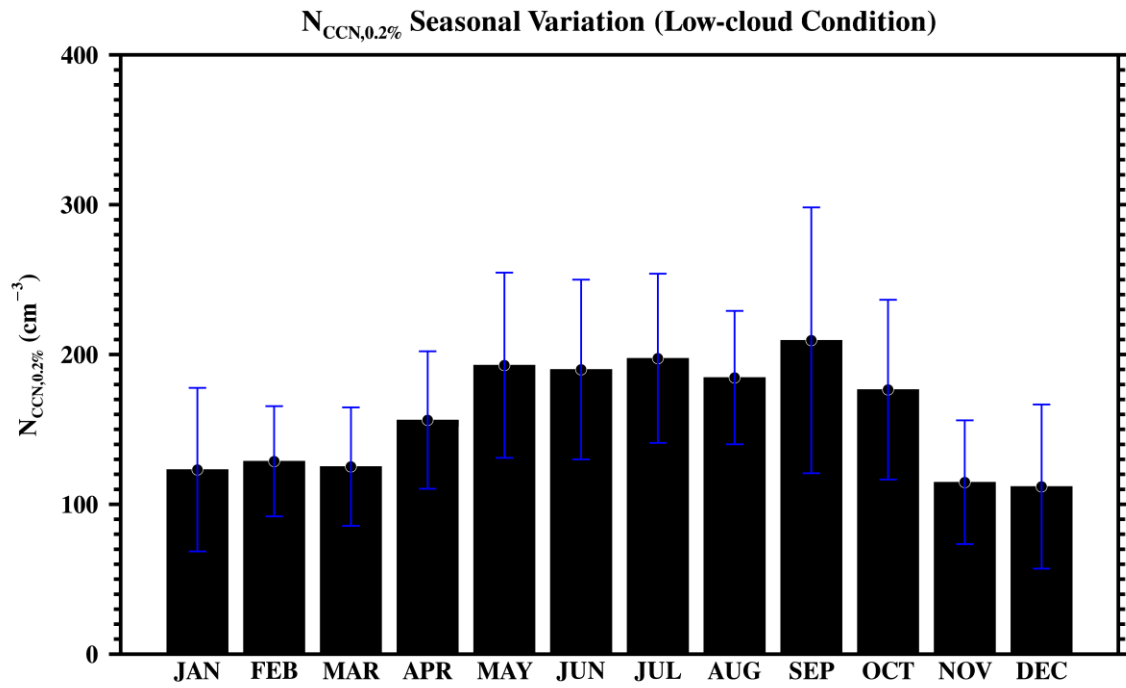

**Figure S3.** Seasonal variation of  $N_{CCN}$  at 0.2% supersaturation level under single-layer low cloud conditions, from 2016 to 2018. Whiskers denote one standard deviation for each bin.

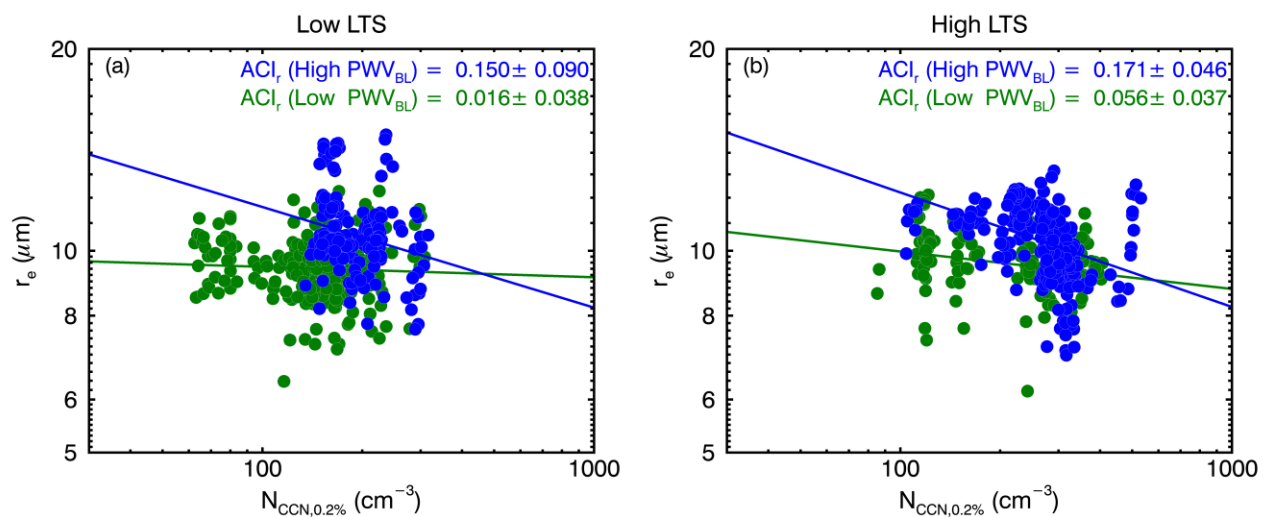

**Figure S4.**  $\text{ACI}_r$  derived from  $r_e$  to  $N_{CCN,0.2\%}$  for (a) low LTS and (b) high LTS regimes. Samples in the low  $\text{PWV}_{BL}$  regime are plotted in green, and samples in the high  $\text{PWV}_{BL}$  regime are plotted in blue.
